# Supplementary material for: Risk factors for recurrent injuries in victims of suspected non-accidental trauma: a retrospective cohort study
Source: Springer Nature journal article supplement (doi:10.1186/1471-2431-14-217), 2014-08-31
Supplement: 12887_2014_1141_MOESM2_ESM.pdf [file 12887_2014_1141_MOESM2_ESM.pdf]

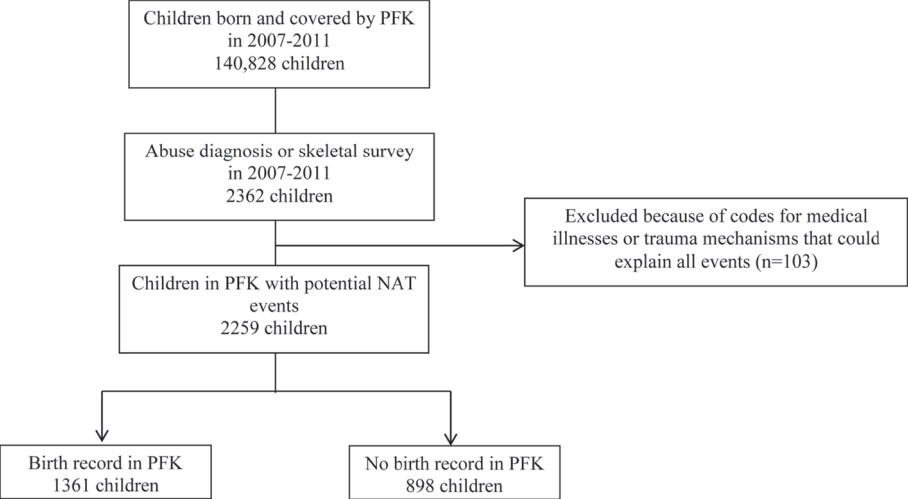

| <b>ICD-9 Grouping Definition</b>    | <b>ICD-9 or CPT codes included</b>                                                                                                                                                                                                                                |
|-------------------------------------|-------------------------------------------------------------------------------------------------------------------------------------------------------------------------------------------------------------------------------------------------------------------|
| Diagnosis of abuse                  | ICD-9 codes: 995.5, 995.50, 995.54, 995.55, 995.59, V61.05, V61.06, V15.4, V15.41, V61.2, V61.21, V71, V71.81, or E960-E968                                                                                                                                       |
| Skeletal survey                     | CPT codes: 77074, 77075, or 77076                                                                                                                                                                                                                                 |
| Injury suspicious for abuse         | ICD-9 codes : 361, 362, 800-904, 910-957                                                                                                                                                                                                                          |
| Excluded trauma mechanisms          | ICD-9 codes :<br>railway accident (E800-E807)<br>motor vehicle accident (E810-E825)<br>other road vehicle accident (E826-E829)<br>water transport accident (E830-E838)<br>air/space transport accident (E840-E845)<br>vehicle accident not classified (E846-E848) |
| Excluded underlying medical illness | ICD-9 codes :<br>osteogenesis imperfect and other musculoskeletal anomalies (756)<br>coagulation defect (286, 287, V83.02, 713.2, 776)<br>liver disease (571-573)                                                                                                 |
| Excluded minor cutaneous injuries   | ICD-9 codes :<br>Insect bite or splinter (910.4-910.7, 911.4-911.7, 912.4-912.5, 914.4-914.7, 915.4-915.7, 916.4-916.7, 919.7)                                                                                                                                    |
| Episodes of follow-up care          | V24, V67                                                                                                                                                                                                                                                          |
